# Supplementary material for: RNA-Seq Analysis Reveals Different Dynamics of Differentiation of Human Dermis- and Adipose-Derived Stromal Stem Cells
Source: PLoS One. 2012 Jun 19;7(6):e38833. doi: 10.1371/journal.pone.0038833 (PMC3378616; doi:10.1371/journal.pone.0038833)
Supplement: Table S2 — The list of lineage-specific genes. (XLSX) [file pone.0038833.s003.xlsx]

## Sheet: Lineage specific genes
Table S2 - The list of lineage-specific genes
Adipo-specific genes					Osteo-specific genes					Chondro-specific genes
FB		AdMSC			FB		AdMSC			FB		AdMSC
Up	Down	Up	Down		Up	Down	Up	Down		Up	Down	Up	Down
VAT1	MGLL	VAT1	CFL1		CEBPD	ADAM12	GLIPR1	ADAM12		RPL39	COPE	SLC7A1	COPE
CBX5	GLIPR1	CBX5	EFEMP2		H2AFJ	ADAMTS6	GLUL	ADAMTS6		SNRPF	CAV1	PPIB	CAV1
VIM	LOC730755	VIM	CALU		GLIPR1	ADM	GREM1	ADM		OXSR1	ATP2B4	PRPF8	ATP2B4
S100A11	RRM1	S100A11	GTF2F1		GLUL	ALPK2	HLA-E	ALPK2		FKBP1A	GNA14	RPS6	GNA14
CRISPLD2	FTH1	CRISPLD2	LMNA		GREM1	ANXA5	IGFBP3	ANXA5		CNPY2	CITED2	RAC1	CITED2
STMN1	CFL1	STMN1	TPM1		HLA-E	APOD	IGFBP5	APOD		JAK1	ATP5L	PGK1	ATP5L
LYRM2	EFEMP2	LYRM2	PDLIM7		IGFBP3	BLOC1S1	IL1R1	BLOC1S1		SASH1	DCN	RBMX	DCN
GLUL	CALU	GLUL	CORO1C		IGFBP5	BTG1	ITGA10	BTG1		KIAA1199	DDX21	UQCR11	DDX21
MAP1A	GTF2F1	MAP1A	HMGB1		IL1R1	C10orf10	LOC730755	C10orf10		SH3BGRL3	ATP5I	UQCRQ	ATP5I
REXO2	LMNA	REXO2	TUBB6		ITGA10	C1QTNF1	MALL	C1QTNF1		NDUFA4	HEXA	TSR1	HEXA
LAMB1	TPM1	LAMB1	TAF15		LOC730755	C1R	MARCKS	C1R		RBBP7	SEPT7P2	RPL36	SEPT7P2
ZADH2	PDLIM7	ZADH2	UCHL1		MALL	C1S	MARS	C1S		LILRA3	LASP1	TRPC4	LASP1
FZD6	CORO1C	FZD6	ATP2B4		MARCKS	CABC1	MEGF10	CABC1		SSR1	IQCG	RPS25	IQCG
PSMC3IP	HMGB1	PSMC3IP	ACTG1		MARS	CALU	MT1E	CALU		RPS27L	ITGA10	UQCRH	ITGA10
MTRNR2L8	TUBB6	MTRNR2L8	ACTB		MEGF10	CBLB	MT1L	CBLB		WASF2	LOC541471	TXNRD1	LOC541471
ECH1	TAF15	ECH1	RHOA		MT1E	CD5	MT2A	CD5		EIF1	IFITM1	RPL32	IFITM1
TIMP3	UCHL1	TIMP3	ACTN1		MT1L	CFD	MTRNR2L2	CFD		DKK1	CAT	SHFM1	CAT
COMP	ATP2B4	COMP	MYOF		MT2A	CKAP4	MYOF	CKAP4		ZNF185	FAT4	WHAMM	FAT4
FKBP7	ACTG1	FKBP7	PTRF		MTRNR2L2	CNR1	NAP1L4	CNR1		PODXL	NDUFB2	STC2	NDUFB2
RPL3	ACTB	RPL3	ANXA1		MYOF	CORIN	NID1	CORIN		RASA4	NCRNA00152	RBM3	NCRNA00152
SERPINF1	RHOA	SERPINF1	CTGF		NAP1L4	CPM	NNMT	CPM		LTA4H	SLC7A1	TMEM50A	CALU
EEF1A1	ACTN1	EEF1A1	ARPC5		NID1	CRABP2	NTM	CRABP2		LUM	CALU	RPL39	NAP1L4
NNMT	MYOF	NNMT	MSN		NNMT	CYB5A	PDE4DIP	CYB5A		LMNA	NAP1L4	SNRPF	BMPER
HTRA1	PTRF	HTRA1	ADAM9		NTM	DAB2	PDGFRA	DAB2		EIF3C	BMPER	SASH1	LAMA4
SOD2	ANXA1	SOD2	COPG		PDE4DIP	DCAF12	PDLIM7	DCAF12		COPS6	LAMA4	SH3BGRL3	ARF4
RPL6	CTGF	RPL6	KDELR3		PDGFRA	DCN	PFKP	DCN		PKM2	ARF4	RBBP7	COMMD6
AOX1	ARPC5	AOX1	CHMP2A		PDLIM7	DPT	PKM2	DPT		MCM7	PPIB	SSR1	C15orf63
RPL29	MSN	RPL29	S100A16		PFKP	DPY30	PLIN2	DPY30		RPL26	COMMD6	RPS27L	CLIC4
RPS3A	ADAM9	RPS3A	RHOC		PKM2	ECH1	PODXL	ECH1		COX7A2	C15orf63	WASF2	NEDD8
MAOA	COPG	MAOA	PPP2R1A		PLIN2	EPRS	PPP1R3C	EPRS		ZNF75D	CLIC4	ZNF185	ATOH8
RPL39	KDELR3	RPL39	SH3BGRL3		PODXL	FBLN1	PRELP	FBLN1		MEG3	NEDD8	RASA4	FGF2
EEF1G	CHMP2A	EEF1G	ISLR		PPP1R3C	FBLN5	PRPS1	FBLN5		TSEN54	ATOH8	RPL26	COL11A1
RPL12	S100A16	RPL12	ADAMTS6		PRELP	FBN2	PSAT1	FBN2		PABPC4	FGF2	ZNF75D	NDUFA2
RAB11FIP1	RHOC	RAB11FIP1	EXT1		PRPS1	FBXL17	PTGFR	FBXL17		TMBIM6	COL11A1	TSEN54	CRIM1
RPS5	PPP2R1A	RPS5	EMP3		PSAT1	FGF2	RAB3B	FGF2		MYOF	NDUFA2	TMBIM6	MCM4
RPS3	SH3BGRL3	RPS3	CCDC21		PTGFR	FLNC	RANBP3	FLNC		NAV1	PRPF8	TBCA	DIAPH1
SERPINB6	ISLR	SERPINB6	MYL12B		RAB3B	FTH1	RASSF4	FTH1		PLIN2	CRIM1	TLN1	ENO1
IQCG	ADAMTS6	IQCG	ECM1		RANBP3	FTL	RDBP	FTL		TBCA	MCM4	VAMP3	HGS
AKR1C2	EXT1	AKR1C2	SBDS		RASSF4	FXYD5	REV3L	FXYD5		TLN1	DIAPH1	THRAP3	AXL
ABCC1	EMP3	ABCC1	FLNC		RDBP	GAPDH	SAA2	GAPDH		HSPB7	ENO1	RHOG	FBXO16
PAK1IP1	CCDC21	PAK1IP1	TTLL12		REV3L	GLRX	SAMD11	GLRX		VAMP3	RPS6	SH3BGRL	ENG
TNFRSF11B	MYL12B	TNFRSF11B	G2E3		SAA2	GPX3	SAMHD1	GPX3		THRAP3	HGS	TMEM43	CCDC94
CNOT3	ECM1	CNOT3	MYH9		SAMD11	GREM2	SARS	GREM2		RAB1B	AXL	SERF2	GTF2F1
FAM133B	SBDS	FAM133B	ACTR3		SAMHD1	H3F3B	SERPINF1	H3F3B		RANBP3	FBXO16	SEC61B	PABPC1
LOC728066	FLNC	LOC728066	EXOSC9		SARS	HNMT	SERTAD2	HNMT		RHOG	ENG	TMEM47	C19orf53
JMJD6	TTLL12	JMJD6	DUSP3		SERPINF1	HSPB7	SH2D4A	HSPB7		FKBP7	RAC1	SCOC	ERLIN1
MTRNR2L2	G2E3	MTRNR2L2	CCDC80		SERTAD2	IER3IP1	SLC7A1	IER3IP1		NR3C1	CCDC94	TXNDC17	ATP5E
AKR1C1	MYH9	AKR1C1	TUBA1C		SH2D4A	IFI30	SORBS1	IFI30		RPL30	PGK1	TIMP3	F3
IDH1	ACTR3	IDH1	DIAPH1		SLC7A1	IFITM2	STARD13	IFITM2		NPC2	GTF2F1	TNFRSF11B	CCDC72
ACACB	EXOSC9	ACACB	LMO7		SORBS1	IL10RB	STMN2	IL10RB		FXC1	PABPC1	SH2D4A	NRP1
KIR3DL1	DUSP3	KIR3DL1	PBX3		STARD13	ITGBL1	TCEAL4	ITGBL1		PTGIS	C19orf53	YWHAH	ACTA2
RPS16	CCDC80	RPS16	DAB2		STMN2	KIR3DL1	TFPI2	KIR3DL1		SH3BGRL	ERLIN1	TMEM165	C1QTNF3
AKR1C3	TUBA1C	AKR1C3	AEBP1		TCEAL4	MAP1A	TIMP3	MAP1A		PRKDC	ATP5E	TFPI	LAMC1
FADS1	DIAPH1	FADS1	PRPS1		TFPI2	MAP1B	TMEM119	MAP1B		PPP1CA	F3		DDR2
EVC	LMO7	EVC	HSPB7		TIMP3	CEBPD	TMEM126A			TMEM43	CCDC72		MGLL
RNF24	PBX3	RNF24	LOC541471		TMEM119	H2AFJ	TMEM59			RHOC	NRP1		ATP5B
TRIM59	DAB2	TRIM59	ALPK2		TMEM126A		TMTC1			ENPP2	ACTA2		CORO1C
TRPC4	AEBP1	TRPC4	SERPINE1		TMEM59		TNRC6C			SERF2	C1QTNF3		NDUFB9
NR1H3	PRPS1	NR1H3	CCND1		TMTC1		TPI1			SEC61B	LAMC1		GREM2
	HSPB7	MGLL	NCRNA00152		TNRC6C		TPM1			TMEM47	DDR2		IFITM3
	LOC541471	GLIPR1	TOMM22		TPI1		TRPC4			SCOC	MGLL		HNRNPF
	ALPK2	LOC730755	MT1E		TPM1		TUBA1A			RAB3B	RBMX		IFI30
	SERPINE1	RRM1	SAE1		TRPC4		TXNIP			TXNDC17	ATP5B		COL8A1
	CCND1	FTH1	CRABP2		TUBA1A		UCHL1			PMM2	CORO1C		ISLR
	NCRNA00152		TUBA1A		TXNIP		UPK2			PTPN21	NDUFB9		CLU
	TOMM22		GREM2		UCHL1		VIM			RHOA	GREM2		ARPC3
	MT1E		FRMD6		UPK2		WARS			RNASEK	IFITM3		ELL2
	SAE1		KCNK2		VIM		WISP1			RPL36AL	HNRNPF		ASF1B
	CRABP2		TOE1		WARS		ZFP36L2			PPP2R1A	IFI30		ECE1
	TUBA1A		CALM2		WISP1		ZNF451			TIMP3	COL8A1		CYGB
	GREM2		CKS2		ZFP36L2					TNFRSF11B	ISLR		CCDC80
	FRMD6		MCM7		ZNF451					SH2D4A	CLU		NME1-NME2
	KCNK2		TAGLN2							SERINC1	ARPC3		MALL
	TOE1		SLC7A1							RPS16	UQCR11		AHNAK
	CALM2		PLP2							YWHAH	ELL2		GAPVD1
	CKS2		TMEM173							TMEM165	UQCRQ		PPAP2B
	MCM7		C12orf75							TFPI	ASF1B		EHBP1
	TAGLN2		KIAA1949								ECE1		ADD3
	SLC7A1		LRRC2								CYGB		LDHB
	PLP2		ACTC1								CCDC80		MSN
	TMEM173		NUSAP1								TSR1		NDUFA1
	C12orf75		PAMR1								NME1-NME2		ENPP7
	KIAA1949		IGFBP3								MALL		MYADM
	LRRC2		ANP32E								AHNAK		FKBP8
	ACTC1		RAB3B								GAPVD1		PHPT1
	NUSAP1		CENPM								PPAP2B		NUPR1
	PAMR1		MXRA5								RPL36		OST4
	IGFBP3		AXL								EHBP1		LPCAT3
	ANP32E		FAM129A								TRPC4		GGCT
	RAB3B		ASF1B								ADD3		C11orf31
	CENPM		MCM4								LDHB		CSRP2
	MXRA5		NCAPG2								MSN		EXT1
	AXL		DSP								NDUFA1		NDUFB4
	FAM129A		WHSC1								ENPP7		NADSYN1
	ASF1B		HEG1								MYADM		PFDN5
	MCM4		CDCA8								FKBP8		LOC730755
	NCAPG2		TUBA1B								PHPT1		ACMSD
	DSP		IL32								NUPR1		DDAH1
	WHSC1		KIRREL3								OST4		CTGF
	HEG1		ANLN								LPCAT3		NDUFA13
	CDCA8		SH2D4A								RPS25		EIF3CL
	TUBA1B		TRMU								GGCT		CD151
	IL32		PKM2								UQCRH		MAP1B
	KIRREL3		PON3								C11orf31		LARP1
	ANLN		PLIN3								CSRP2		IFI27L2
	SH2D4A		PSG5								EXT1		OXSR1
	TRMU		MCM5								NDUFB4		FKBP1A
	PKM2		MELK								TXNRD1		CNPY2
	PON3		CENPK								RPL32		JAK1
	PLIN3		PODXL								NADSYN1		KIAA1199
	PSG5		C1R								PFDN5		NDUFA4
	MCM5		PRR11								LOC730755		LILRA3
	MELK		KIF20A								ACMSD		EIF1
	CENPK		SMS								DDAH1		DKK1
	PODXL		TPM3								CTGF		PODXL
	C1R		YWHAZ								SHFM1		LTA4H
	PRR11		KIF23								NDUFA13		LUM
	KIF20A		NTM								EIF3CL		LMNA
	SMS		MALL								CD151		EIF3C
	TPM3		TPX2								WHAMM		COPS6
	YWHAZ		HJURP								STC2		PKM2
	KIF23		KIAA1199								MAP1B		MCM7
	NTM		HSD3B7								LARP1		COX7A2
	MALL		FTHL3								RBM3		MEG3
	TPX2		SHROOM3								IFI27L2		PABPC4
	HJURP		TNRC6C								TMEM50A		MYOF
	KIAA1199		CD63										NAV1
	HSD3B7		YIPF5										PLIN2
	FTHL3		USF2										HSPB7
	SHROOM3		SSX2IP										RAB1B
	TNRC6C		DYNC1I2										RANBP3
	CD63		RANBP3										FKBP7
	YIPF5		CORIN										NR3C1
	USF2		LRRC59										RPL30
	SSX2IP		SERTAD2										NPC2
	DYNC1I2		GREM1										FXC1
	RANBP3		CCNB1										PTGIS
	CORIN		AP2M1										PRKDC
	LRRC59		IGFBP4										PPP1CA
	SERTAD2		SLC44A1										RHOC
	GREM1		MAD2L1										ENPP2
	CCNB1		MED15										RAB3B
	AP2M1		ITGB1										PMM2
	IGFBP4		NID1										PTPN21
	SLC44A1		DPT										RHOA
	MAD2L1		FKBP5										RNASEK
	MED15		SRPX										RPL36AL
	ITGB1		ANGPTL4										PPP2R1A
	NID1		MED14										SERINC1
	DPT												RPS16
	FKBP5
	SRPX
	ANGPTL4
	MED14
